# Supplementary material
Source: PubMed Central journal article supplement (PMC4351964)
Supplement: NIHMS666154-supplement-Supplemental_Information_S2.pdf [file NIHMS666154-supplement-Supplemental_Information_S2.pdf]

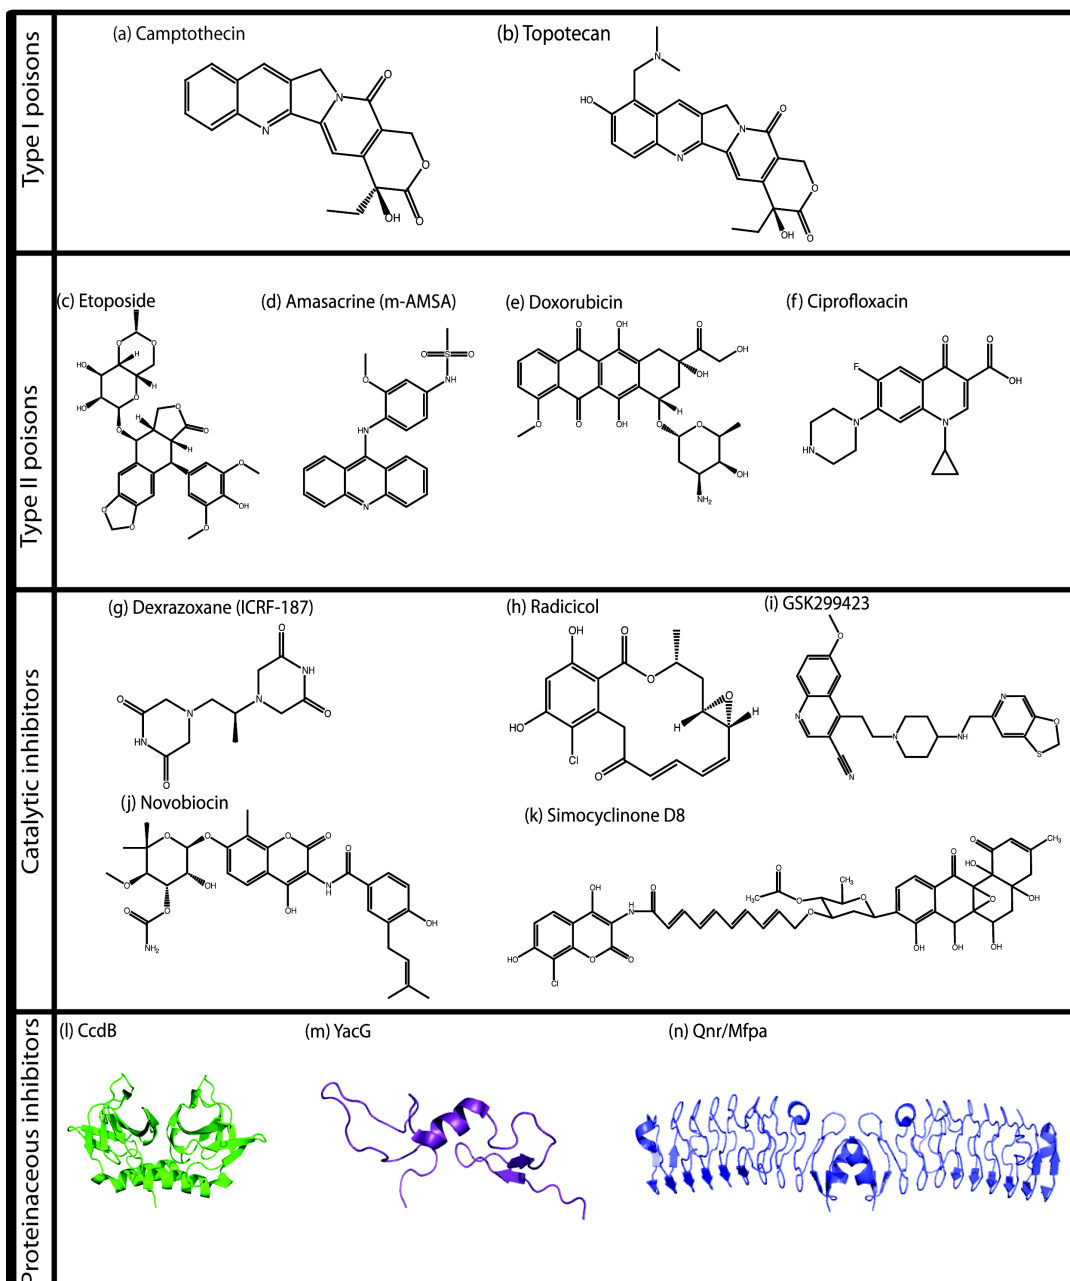

### Supplementary information S2 (figure): Diversity between anti-topoisomerase agents

The chemical structures or ribbon structures of a very limited collection of known topoisomerase inhibitors and poisons is shown. Topoisomerase poisons include small molecules such as: (A) camptothecin<sup>1</sup>, (B) the camptothecin derivative topotecan<sup>2</sup>, (C) etoposide<sup>3</sup>, (D) Amasacrine (m-AMSA)<sup>4</sup>, (E) doxorubicin<sup>5</sup>, (F) ciprofloxacin<sup>6</sup>; catalytic

inhibitor compounds such as: (G) Dexrazoxane (ICRF-187)<sup>7</sup>, (H) radicol<sup>8</sup>, (I) GSK NTBI<sup>9</sup> (J) novobiocin<sup>10</sup>, (K) simocyclinone D8<sup>11</sup>; and proteinaceous inhibitors such as (L) CcdB<sup>12</sup>, (M) YacG<sup>13</sup>, and (N) Qnr/MfpA<sup>14</sup>.

- 1 Hsiang, Y. H., Hertzberg, R., Hecht, S. & Liu, L. F. Camptothecin induces protein-linked DNA breaks via mammalian DNA topoisomerase I. *J Biol Chem* **260**, 14873-14878 (1985).
- 2 Kingsbury, W. D. *et al.* Synthesis of water-soluble (aminoalkyl)camptothecin analogues: inhibition of topoisomerase I and antitumor activity. *Journal of medicinal chemistry* **34**, 98-107 (1991).
- 3 Minocha, A. & Long, B. H. Inhibition of the DNA catenation activity of type II topoisomerase by VP16-213 and VM26. *Biochemical and biophysical research communications* **122**, 165-170 (1984).
- 4 Nelson, E. M., Tewey, K. M. & Liu, L. F. Mechanism of antitumor drug action: poisoning of mammalian DNA topoisomerase II on DNA by 4'-acridinylamino)-methanesulfon-m-anisidide. *Proc Natl Acad Sci USA* **81**, 1361-1365 (1984).
- 5 Tewey, K., Rowe, T., Yang, L., Halligan, B. & Liu, L. Adriamycin-induced DNA damage mediated by mammalian DNA topoisomerase II. *Science* **226**, 466-468 (1984).
- 6 Hooper, D. C. & Wolfson, J. S. Mode of action of the quinolone antimicrobial agents: review of recent information. *Reviews of infectious diseases* **11 Suppl 5**, S902-911 (1989).
- 7 Insaf, S., Danks, M. & Witiak, D. A structure-function analysis of DNA topoisomerase II inhibitors. *Current Medicinal Chemistry* **3**, 437-466 (1996).
- 8 Corbett, K. D. & Berger, J. M. Structural basis for topoisomerase VI inhibition by the anti-Hsp90 drug radicol. *Nucleic Acids Res* **34**, 4269-4277 (2006).
- 9 Bax, B. D. *et al.* Type IIA topoisomerase inhibition by a new class of antibacterial agents. *Nature* **466**, 935-940 (2010).
- 10 Lewis, R. J. *et al.* The nature of inhibition of DNA gyrase by the coumarins and the cyclothialidines revealed by X-ray crystallography. *EMBO J* **15**, 1412-1420 (1996).
- 11 Edwards, M. J. *et al.* A crystal structure of the bifunctional antibiotic simocyclinone D8, bound to DNA gyrase. *Science* **326**, 1415-1418 (2009).
- 12 Loris, R. *et al.* Crystal structure of CcdB, a topoisomerase poison from *E. coli*. *Journal of Molecular Biology* **285**, 1667-1677 (1999).
- 13 Ramelot, T. A. *et al.* NMR structure of the *Escherichia coli* protein YacG: A novel sequence motif in the zinc-finger family of proteins. *Proteins* **49**, 289-293 (2002).
- 14 Hegde, S. *et al.* A fluoroquinolone resistance protein from *Mycobacterium tuberculosis* that mimics DNA. *Science* **308**, 1480-1483 (2005).
