# Supplementary material
Source: PubMed Central journal article supplement (PMC4351964)
Supplement: NIHMS666154-supplement-Supplementary_Table_1.pdf [file NIHMS666154-supplement-Supplementary_Table_1.pdf]

## Supplementary information S1 (table) : A partial list of the topoisomerase interactome

| TOPOISOMERASE                                     | PARTNER                   | SUGGESTED CELLULAR ROLE FOR INTERACTION                                                                                                                     | SYSTEM(S) OBSERVED                                                  | REFERENCE |
|---------------------------------------------------|---------------------------|-------------------------------------------------------------------------------------------------------------------------------------------------------------|---------------------------------------------------------------------|-----------|
| <u>COMPACTION</u>                                 |                           |                                                                                                                                                             |                                                                     |           |
| Topo IV,<br>Topo II                               | SMCs and<br>MukB          | Potential role in chromosome compaction and segregation                                                                                                     | <i>E. coli, Drosophila</i>                                          | 1-3       |
| <u>DNA REPLICATION AND CHROMOSOME SEGREGATION</u> |                           |                                                                                                                                                             |                                                                     |           |
| Topo IV,<br>Topo II $\alpha$                      | Clamp<br>loader,<br>PCNA  | Localizes ParC subunit to replication factory, localizes Topo II $\alpha$ to origin of replication                                                          | <i>E. coli</i> , Avian DT40 cell line                               | 4,5       |
| Topo II                                           | Rrm3                      | Assists in permitting replication fork passage and replication termination at genomic pausing elements in eukaryotes                                        | Yeast                                                               | 6         |
| Topo IV                                           | SeqA                      | Stimulates Topo IV relaxation and decatenation activity through direct interaction                                                                          | <i>E. coli</i>                                                      | 7         |
| Topo IV                                           | MreB                      | Promotes chromosome segregation in bacteria                                                                                                                 | <i>E. coli</i>                                                      | 8         |
| Topo IV                                           | Ftsk                      | Promotes chromosome segregation in bacteria                                                                                                                 | <i>E. coli, Caulobacter crescentus</i>                              | 9,10      |
| Topo II $\alpha$                                  | RanBP2                    | Induces sumoylation of topo II $\alpha$ to influence its localization and activity                                                                          | Mice                                                                | 11        |
| Topo II $\alpha$                                  | PIAS $\gamma$             | Catalyzes sumoylation of topo II $\alpha$ to negatively regulate its activity                                                                               | <i>Xenopus</i>                                                      | 12        |
| Topo II $\alpha$                                  | Polo-like<br>kinase (PLK) | Activates Topo II $\alpha$ for chromosome decatenation                                                                                                      | Human cell lines                                                    | 13        |
| Topo II                                           | Aurora B<br>Kinase        | May promote centromere resolution                                                                                                                           | <i>Drosophila</i> , Human HeLa cell line                            | 14        |
| Topo II $\alpha$ /<br>Topo II                     | HMGB1/<br>HMO1            | Chaperone topoisomerase to specific DNA structures                                                                                                          | <i>S. cerevisiae</i> , human proteins reconstituted <i>in vitro</i> | 15        |
| Gyrase                                            | MarR                      | Sequester the MarR repressor of the <i>marRAB</i> operon                                                                                                    | <i>E. coli</i>                                                      | 16        |
| TopoII $\alpha/\beta$                             | HDAC<br>1/HDAC2           | May localize to specific chromosomal regions or influence activity of the enzyme; it was recently reported that Topo II $\beta$ is acetylated <sup>17</sup> | Human                                                               | 18        |
| Topo IB                                           | SR proteins               | Topo IB dependent phosphorylation of SR protein RS domain                                                                                                   | Human                                                               | 19-21     |
| Topo IB                                           | Hrp                       | Chromatin remodeling                                                                                                                                        | <i>S. pombe</i>                                                     | 22        |
| Topo II                                           | CHRAC                     | Chromatin remodeling                                                                                                                                        | <i>Drosophila</i>                                                   | 23        |
| Topo II $\alpha$ /<br>Topo II                     | Sgs1/BLM/<br>RECQL5       | Stimulates decatenation activity and may be important for proper cell cycle progression.                                                                    | <i>S. cerevisiae</i> , Human cell lines                             | 24-26     |
| <u>TRANSCRIPTION</u>                              |                           |                                                                                                                                                             |                                                                     |           |
| Topo II $\beta$                                   | PARP                      | Promotes steroid receptor mediated transcription initiation                                                                                                 | APL human cells, MCF cells                                          | 27,28     |
| Topo II $\beta$                                   | RAR $\alpha$              | Promotes the negative transcriptional regulation of retinoic acid regulated genes                                                                           | PML human cell lines                                                | 27        |
| Topo IA                                           | RNA<br>polymerase         | Physical interaction with the C-terminus of topo IA may stimulate Topo IA or localize it to supercoils produced by the RNA polymerase                       | <i>E. coli</i>                                                      | 29        |
| Topo IB                                           | SR proteins               | Leads to Topo IB dependent phosphorylation of SR proteins RS domain                                                                                         | <i>Drosophila</i>                                                   | 30        |
| <u>POSTTRANSLATIONAL MODIFICATIONS</u>            |                           |                                                                                                                                                             |                                                                     |           |
| Topo II                                           | Pkc1                      | Possible role in thermal regulation pathway                                                                                                                 | <i>S. cerevisiae</i>                                                | 31        |
| Topo II                                           | Siz1/Siz2                 | Mediate Smt3 sumoylation of topo II to localize topo II to pericentric chromosome regions                                                                   | <i>S. cerevisiae</i>                                                | 32        |

RECOMBINATION AND REPAIR

|                                   |                                                     |                                                                                                                         |                                                                          |       |
|-----------------------------------|-----------------------------------------------------|-------------------------------------------------------------------------------------------------------------------------|--------------------------------------------------------------------------|-------|
| Topo III                          | RecQ<br>helicases (e.g.,<br>BLM, Sgs1,<br>and RecQ) | Assists in homologous recombination to resolve Holliday<br>junctions and hemicatenanes resulting during DNA replication | Yeast, PML human<br>cell line, <i>E. coli</i>                            | 33-35 |
| Topo III                          | SSB,RPA,Rmi1<br>and Rmi2                            | Stablize RecQ helicase/topo III complex                                                                                 | HeLa human cell<br>line, avian DT40 cell<br>line, <i>E. coli</i> , yeast | 36-38 |
| Topo IB<br>Topo II $\alpha/\beta$ | Ubc9, SUMO-1                                        | SUMO conjugation in response to topoisomerase mediated<br>DNA-damage                                                    | Human                                                                    | 39,40 |
| Topo IB,<br>Topo II               | Tdp1 and<br>Tdp2                                    | Phosphodiesterases that remove topoisomerase covalently attached to<br>DNA ends                                         | <i>S. cerevisiae</i> , human<br>cell extracts, avian<br>DT40 cell line   | 41-44 |

PROTEINACEOUS INHIBITORS

|                       |                                 |                                                                                                                                           |                                                                                                 |       |
|-----------------------|---------------------------------|-------------------------------------------------------------------------------------------------------------------------------------------|-------------------------------------------------------------------------------------------------|-------|
| Gyrase                | CcdB                            | F plasmid derived poison of gyrase that promotes F plasmid<br>maintenance by killing cells that do not possess the CcdB<br>inhibitor CcdA | <i>E. coli</i>                                                                                  | 45    |
| Gyrase and<br>Topo IV | Qnr,<br>Mfpa, and<br>Albucidin  | Qnr and Mfpa are structurally reminiscent of DNA and inhibit<br>quinolone binding by gyrase/topo IV                                       | <i>E. coli</i> , <i>M.</i><br><i>tuberculosis</i> ,<br><i>Xanthomonas</i><br><i>albilineans</i> | 46-49 |
| Gyrase                | GyrI                            | Chromosomally encoded bacterial gene that inhibits the<br>activity of CcdB and peptide microbicin B17                                     | <i>E. coli</i>                                                                                  | 50,51 |
| Gyrase                | Microcin B17                    | Peptide poison of gyrase                                                                                                                  | <i>E. coli</i>                                                                                  | 52    |
| Gyrase                | Murl<br>(Glutamate<br>racemase) | Negatively regulates gyrase function                                                                                                      | <i>E. coli</i> , <i>M.</i><br><i>smegmatis</i> , <i>M.</i><br><i>tuberculosis</i>               | 53-55 |
| Gyrase                | LdACT                           | <i>Leishmania actin</i> inhibits <i>E. coli</i> gyrase decatenation function<br>through physical interaction                              | <i>In vitro</i> assays                                                                          | 56    |
| Gyrase                | YacG                            | Endogenous inhibitor of GyrB in <i>E. coli</i>                                                                                            | <i>E. coli</i>                                                                                  | 57    |

OTHER INTERACTIONS

|                  |          |                                                           |                |    |
|------------------|----------|-----------------------------------------------------------|----------------|----|
| Topo II $\alpha$ | 14-3-3-e | Modulates topo II $\alpha$ interaction with drugs and DNA | HeLa cell line | 58 |
|------------------|----------|-----------------------------------------------------------|----------------|----|

**References**

- 1 Bhat, M. A., Philp, A. V., Glover, D. M. & Bellen, H. J. Chromatid segregation at anaphase requires the barren product, a novel chromosome-associated protein that interacts with Topoisomerase II. *Cell* **87**, 1103-1114 (1996).
- 2 Li, Y. *et al.* Escherichia coli condensin MukB stimulates topoisomerase IV activity by a direct physical interaction. *Proc Natl Acad Sci USA* **107**, 18832-18837 (2010).
- 3 Hayama, R. & Marians, K. J. Physical and functional interaction between the condensin MukB and the decatenase topoisomerase IV in Escherichia coli. *Proc Natl Acad Sci U S A* **107**, 18826-18831 (2010).
- 4 Espeli, O., Levine, C., Hassing, H. & Marians, K. J. Temporal regulation of topoisomerase IV activity in *E. coli*. *Mol Cell* **11**, 189-201 (2003).
- 5 Niimi, A., Suka, N., Harata, M., Kikuchi, A. & Mizuno, S. Co-localization of chicken DNA topoisomerase II $\alpha$ , but not  $\beta$ , with sites of DNA replication and possible involvement of a C-terminal region of  $\alpha$  through its binding to PCNA. *Chromosoma* **110**, 102-114 (2001).
- 6 Fachinetti, D. *et al.* Replication termination at eukaryotic chromosomes is mediated by Top2 and occurs at genomic loci containing pausing elements. *Mol Cell* **39**, 595-605 (2010).
- 7 Kang, S., Han, J., Park, J., Skarstad, K. & HWang, D. SeqA protein stimulates the relaxing and decatenating activities of topoisomerase IV. *J Biol Chem* **278**, 48779-48785 (2003).

- 8 Madabhushi, R. & Mariani, K. J. Actin homolog MreB affects chromosome segregation by regulating topoisomerase IV in Escherichia coli. *Mol Cell* **33**, 171-180 (2009).
- 9 Espeli, O., Lee, C. & Mariani, K. J. A physical and functional interaction between Escherichia coli FtsK and topoisomerase IV. *J Biol Chem* **278**, 44639-44644 (2003).
- 10 Wang, S., West, L. & Shapiro, L. The Bifunctional FtsK Protein Mediates Chromosome Partitioning and Cell Division in Caulobacter. *Journal of Bacteriology* **188**, 1497 (2006).
- 11 Dawlaty, M. M. *et al.* Resolution of sister centromeres requires RanBP2-mediated SUMOylation of topoisomerase IIalpha. *Cell* **133**, 103-115 (2008).
- 12 Ryu, H., Furuta, M., Kirkpatrick, D., Gygi, S. P. & Azuma, Y. PIASy-dependent SUMOylation regulates DNA topoisomerase II alpha activity. *J Cell Biol* **191**, 783-794 (2010).
- 13 Li, H., Wang, Y. & Liu, X. Plk1-dependent phosphorylation regulates functions of DNA topoisomerase II $\alpha$  in cell cycle progression. *J Biol Chem* **283**, 6209 (2008).
- 14 Coelho, P. A. *et al.* Dual role of topoisomerase II in centromere resolution and aurora B activity. *PLoS Biol* **6**, e207 (2008).
- 15 Stros, M., Bacíková, A., Polanská, E., Stokrová, J. & Strauss, F. HMGB1 interacts with human topoisomerase IIalpha and stimulates its catalytic activity. *Nucleic Acids Res* **35**, 5001-5013 (2007).
- 16 Domain, F. & Levy, S. B. GyrA Interacts with MarR To Reduce Repression of the marRAB Operon in Escherichia coli. *Journal of Bacteriology* **192**, 942-948 (2010).
- 17 Choudhary, C. *et al.* Lysine acetylation targets protein complexes and co-regulates major cellular functions. *Science* **325**, 834-840 (2009).
- 18 Tsai, S. C. *et al.* Histone deacetylase interacts directly with DNA topoisomerase II. *Nature genetics* **26**, 349-353 (2000).
- 19 Labourier, E. *et al.* Interaction between the N-terminal domain of human DNA topoisomerase I and the arginine-serine domain of its substrate determines phosphorylation of SF2/ASF splicing factor. *Nucleic Acids Res* **26**, 2955-2962 (1998).
- 20 Kowalska-Loth, B., Girstun, A., Trzcińska, A. M., Piekiełko-Witkowska, A. & Staron, K. SF2/ASF protein binds to the cap region of human topoisomerase I through two RRM domains. *Biochemical and biophysical research communications* **331**, 398-403 (2005).
- 21 Rossi, F. *et al.* Specific phosphorylation of SR proteins by mammalian DNA topoisomerase I. *Nature* **381**, 80-82 (1996).
- 22 Durand-Dubief, M., Persson, J., Norman, U., Hartsuiker, E. & Ekwall, K. Topoisomerase I regulates open chromatin and controls gene expression in vivo. *EMBO J* **29**, 2126-2134 (2010).
- 23 Varga-Weisz, P. D. *et al.* Chromatin-remodelling factor CHRAC contains the ATPases ISWI and topoisomerase II. *Nature* **388**, 598-602 (1997).
- 24 Russell, B. *et al.* Chromosome breakage is regulated by the interaction of the BLM helicase and topoisomerase IIalpha. *Cancer Research* **71**, 561-571 (2011).
- 25 Watt, P. M., Louis, E. J., Borts, R. H. & Hickson, I. D. Sgs1: A eukaryotic homolog of E. coli RecQ that interacts with topoisomerase II in vivo and is required for faithful chromosome segregation. *Cell* **81**, 253-260 (1995).
- 26 Ramamoorthy, M. *et al.* RECQL5 cooperates with Topoisomerase II alpha in DNA decatenation and cell cycle progression. *Nucleic acids Res* (2011).
- 27 Mcnamara, S., Wang, H., Hanna, N. & Miller, W. Topoisomerase IIb Negatively Modulates Retinoic Acid Receptor a Function: a Novel Mechanism of Retinoic Acid Resistance. *Mol Cell Biol* **28**, 2066-2077 (2008).
- 28 Ju, B. G. *et al.* A topoisomerase IIbeta-mediated dsDNA break required for regulated transcription. *Science* **312**, 1798-1802 (2006).
- 29 Cheng, B., Zhu, C. X., Ji, C., Ahumada, A. & Tse-Dinh, Y. C. Direct interaction between Escherichia coli RNA polymerase and the zinc ribbon domains of DNA topoisomerase I. *J Biol Chem* **278**, 30705-30710 (2003).
- 30 Juge, F., Fernando, C., Fic, W. & Tazi, J. The SR protein B52/SRp55 is required for DNA topoisomerase I recruitment to chromatin, mRNA release and transcription shutdown. *PLoS Genet* **6** (2010).
- 31 Mouchel, N. & Jenkins, J. The identification of a functional interaction between PKC and topoisomerase II. *FEBS letters* (2006).
- 32 Takahashi, Y. SIZ1/SIZ2 Control of Chromosome Transmission Fidelity Is Mediated by the Sumoylation of Topoisomerase II. *Genetics* **172**, 783-794 (2005).

- 33 Gangloff, S., McDonald, J., Bendixen, C., Arthur, L. & Rothstein, R. The yeast type I topoisomerase Top3 interacts with Sgs1, a DNA helicase homolog: a potential eukaryotic reverse gyrase. *Mol Cell Biol* **14**, 8391-8398 (1994).
- 34 Hu, P. *et al.* Evidence for BLM and Topoisomerase III $\alpha$  interaction in genomic stability. *Hum Mol Genet* **10**, 1287-1298 (2001).
- 35 Harmon, F. G., DiGate, R. J. & Kowalczykowski, S. C. RecQ helicase and topoisomerase III comprise a novel DNA strand passage function: a conserved mechanism for control of DNA recombination. *Mol Cell* **3**, 611-620 (1999).
- 36 Suski, C. & Mariani, K. J. Resolution of converging replication forks by RecQ and topoisomerase III. *Mol Cell* **30**, 779-789 (2008).
- 37 Chang, M. *et al.* RMI1/NCE4, a suppressor of genome instability, encodes a member of the RecQ helicase/Topo III complex. *EMBO J* **24**, 2024-2033 (2005).
- 38 Xu, D. *et al.* RMI, a new OB-fold complex essential for Bloom syndrome protein to maintain genome stability. *Genes & Development* **22**, 2843 (2008).
- 39 Mao, Y., Desai, S. D. & Liu, L. F. SUMO-1 Conjugation to Human DNA Topoisomerase II Isozymes. *J Biol Chem* **275**, 26066-26073 (2000).
- 40 Mao, Y., Sun, M., Desai, S. D. & Liu, L. F. SUMO-1 conjugation to topoisomerase I: a possible repair response to topoisomerase-mediated DNA damage. *Proc Natl Acad Sci USA* **97**, 4046-4051 (2000).
- 41 Pouliot, J. J., Yao, K. C., Robertson, C. A. & Nash, H. A. Yeast gene for a Tyr-DNA phosphodiesterase that repairs topoisomerase I complexes. *Science* **286**, 552-555 (1999).
- 42 Nitiss, K. C., Malik, M., He, X., White, S. W. & Nitiss, J. L. Tyrosyl-DNA phosphodiesterase (Tdp1) participates in the repair of Top2-mediated DNA damage. *Proc Natl Acad Sci U S A* **103**, 8953-8958 (2006).
- 43 Cortes Ledesma, F., El Khamisy, S. F., Zuma, M. C., Osborn, K. & Caldecott, K. W. A human 5'-tyrosyl DNA phosphodiesterase that repairs topoisomerase-mediated DNA damage. *Nature* **461**, 674-678 (2009).
- 44 Zeng, Z., Cortes-Ledesma, F., El Khamisy, S. F. & Caldecott, K. W. TDP2/TTRAP is the major 5'-tyrosyl DNA phosphodiesterase activity in vertebrate cells and is critical for cellular resistance to topoisomerase II-induced DNA Damage. *J Biol Chem* **286**, 403-409.
- 45 Bernard, P. & Couturier, M. Cell killing by the F plasmid CcdB protein involves poisoning of DNA-topoisomerase II complexes. *J Mol Biol* **226**, 735-745 (1992).
- 46 Hegde, S. *et al.* A fluoroquinolone resistance protein from Mycobacterium tuberculosis that mimics DNA. *Science* **308**, 1480 (2005).
- 47 Tran, J. H., Jacoby, G. A. & Hooper, D. C. Interaction of the plasmid-encoded quinolone resistance protein QnrA with Escherichia coli topoisomerase IV. *Antimicrobial Agents Chemother* **49**, 3050-3052 (2005).
- 48 Tran, J., Jacoby, G. & Hooper, D. Interaction of the plasmid-encoded quinolone resistance protein Qnr with Escherichia coli DNA gyrase. *Antimicrob Agents Chemother* **49**, 118-125 (2005).
- 49 Hashimi, S., Wall, M., Smith, A., Maxwell, A. & Birch, R. The Phytotoxin Albicidin is a Novel Inhibitor of DNA Gyrase. *Antimicrobial Agents Chemother* **51**, 181 (2007).
- 50 Rampakakis, E. & Zannis-Hadjopoulos, M. Transient dsDNA breaks during pre-replication complex assembly. *Nucleic Acids Res* **37**, 5714 (2009).
- 51 Chatterji, M., Sengupta, S. & Nagaraja, V. Chromosomally encoded gyrase inhibitor Gyrl protects Escherichia coli against DNA-damaging agents. *Arch Microbiol* **180**, 339-346 (2003).
- 52 Vizán, J., Hernández-Chico, C., del Castillo, I. & Moreno, F. The peptide antibiotic microcin B17 induces double-strand cleavage of DNA mediated by E. coli DNA gyrase. *EMBO J* **10**, 467 (1991).
- 53 Ashiuchi, M., Kuwana, E., Komatsu, K., Soda, K. & Misono, H. Differences in effects on DNA gyrase activity between two glutamate racemases of Bacillus subtilis, the poly- $\gamma$ -glutamate synthesis-linking Glr enzyme and the YrpC (Murl) isozyme. *FEMS microbiology letters* **223**, 221-225 (2003).
- 54 Sengupta, S., Shah, M. & Nagaraja, V. Glutamate racemase from Mycobacterium tuberculosis inhibits DNA gyrase by affecting its DNA-binding. *Nucleic Acids Res* **34**, 5567-5576 (2006).
- 55 Sengupta, S. & Nagaraja, V. Inhibition of DNA gyrase activity by Mycobacterium smegmatis Murl. *FEMS microbiology letters* **279**, 40-47 (2008).
- 56 Kapoor, P. *et al.* Leishmania actin binds and nicks kDNA as well as inhibits decatenation activity of type II topoisomerase. *Nucleic acids Res* **38**, 3308-3317 (2010).

- 57 Sengupta, S. & Nagaraja, V. YacG from *Escherichia coli* is a specific endogenous inhibitor of DNA gyrase. *Nucleic Acids Res* **36**, 4310 (2008).
- 58 Kurz, E. U., Leader, K. B., Kroll, D. J., Clark, M. & Gieseler, F. Modulation of human DNA topoisomerase II $\alpha$  function by interaction with 14-3-3epsilon. *J Biol Chem* **275**, 13948-13954 (2000).
